# Supplementary material for: Fluorescent Zn(II)-Based Metal-Organic Framework: Interaction with Organic Solvents and CO2 and Methane Capture
Source: MDPI journal article supplement (doi:10.3390/molecules27123845), 2022-06-15
Supplement: s1 [file s1]

Supplementary Materials

# Fluorescent Zn(II)-Based Metal-Organic Framework: Interaction with Organic Solvents and CO<sub>2</sub> and Methane Capture

Sifani Zavahir <sup>1</sup>, Hamdi Ben Yahia <sup>2</sup>, Julian Schneider <sup>3</sup>, DongSuk Han <sup>1</sup>, Igor Krupa <sup>1</sup>, Tausif Altamash <sup>2</sup>, Mert Atilhan <sup>4</sup>, Abdulkarem Amhamed <sup>2,\*</sup> and Peter Kasak <sup>1,\*</sup>

<sup>1</sup> Center for Advanced Materials, Qatar University, Doha P.O. Box 2713, Qatar; fathima.z@qu.edu.qa (S.Z.); dhan@qu.edu.qa (D.H.); igor.krupa@qu.edu.qa (I.K.)

<sup>2</sup> Qatar Environment & Energy Research Institute, Hamad Bin Khalifa University, Doha 34110, Qatar; benyahia\_hamdi@yahoo.fr (H.B.Y.); taltamash@hbku.edu.qa (T.A.); aamhamed@hbku.edu.qa (A.A.)

<sup>3</sup> Department of Materials Science and Engineering, and Center for Functional Photonics (CFP), City University of Hong Kong, 83 Tat Chee Avenue, Hong Kong 999077, China; julianschneider86@gmx.de

<sup>4</sup> Department of Chemical and Paper Engineering, Western Michigan University, Kalamazoo, MI 49008, USA; mert.atilhan@wmich.edu

\* Correspondence: aamhamed@hbku.edu.qa (A.A.); peter.kasak@qu.edu.qa (P.K.)

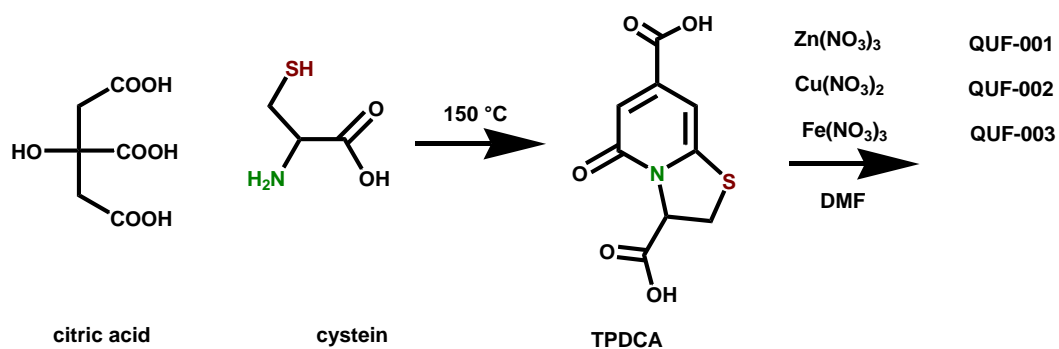

Figure S1. Synthesis of TPDCA and related MOF.

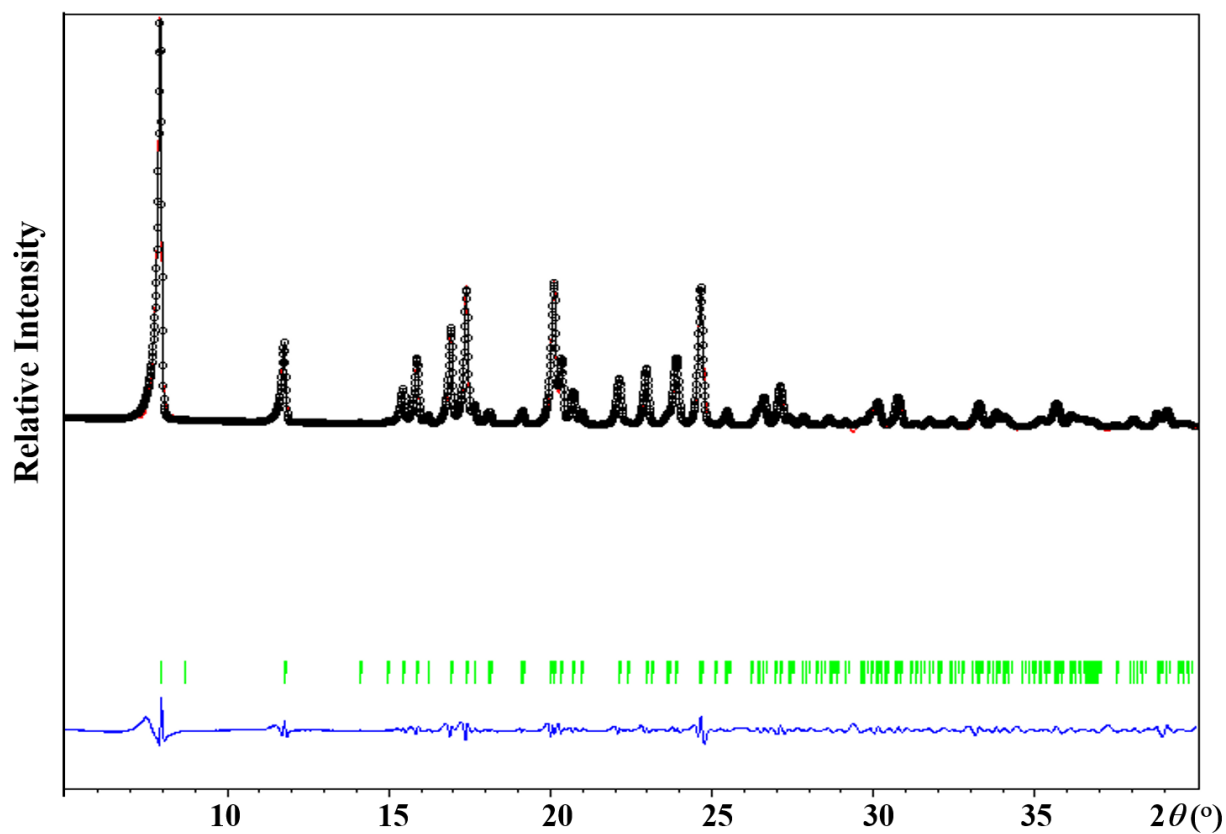

Figure S2. Full pattern matching of the XRPD pattern of the QUF-001 compound.

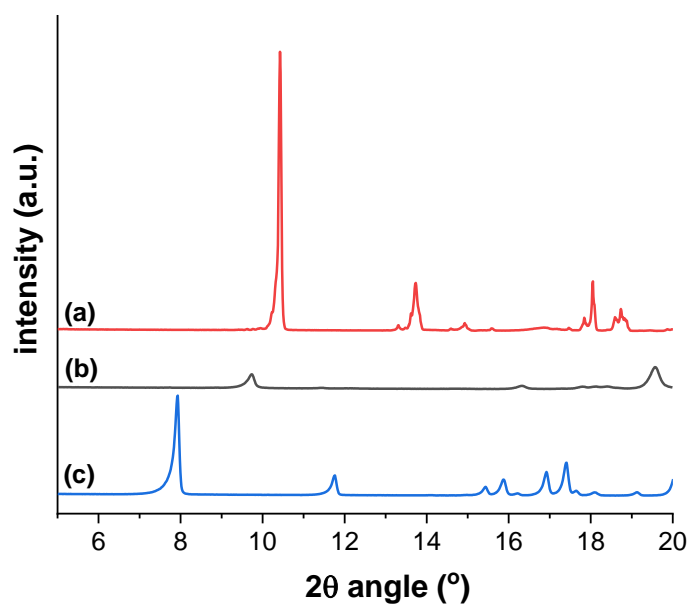

**Figure S3.** XRPD patterns of (a) TPDCA, (b) QUF-001 with a solvent isopropanol and (c) pure QUF-001.

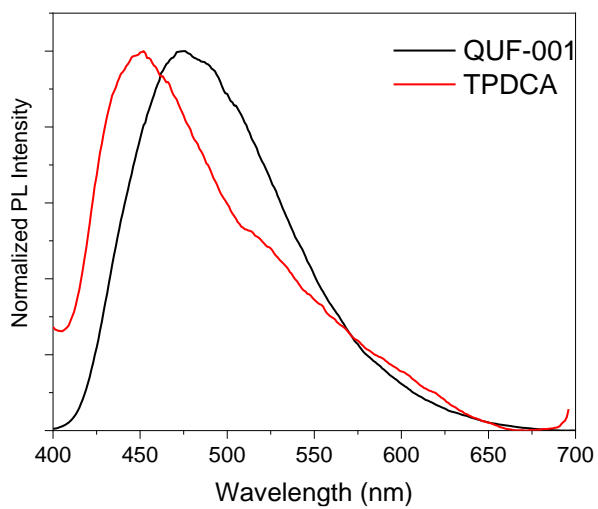

**Figure S4.** Emission spectra of TPDCA (red line) and QUF-001 (black line), excited at 375 nm.

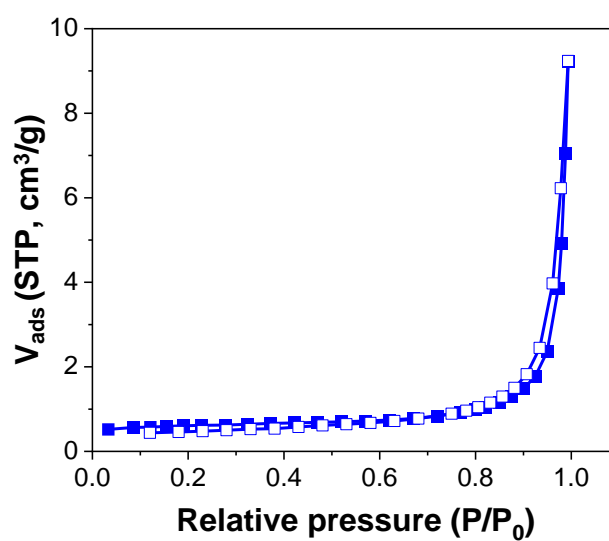

**Figure S5.** N<sub>2</sub> gas adsorption-desorption measurements of QUF-001.

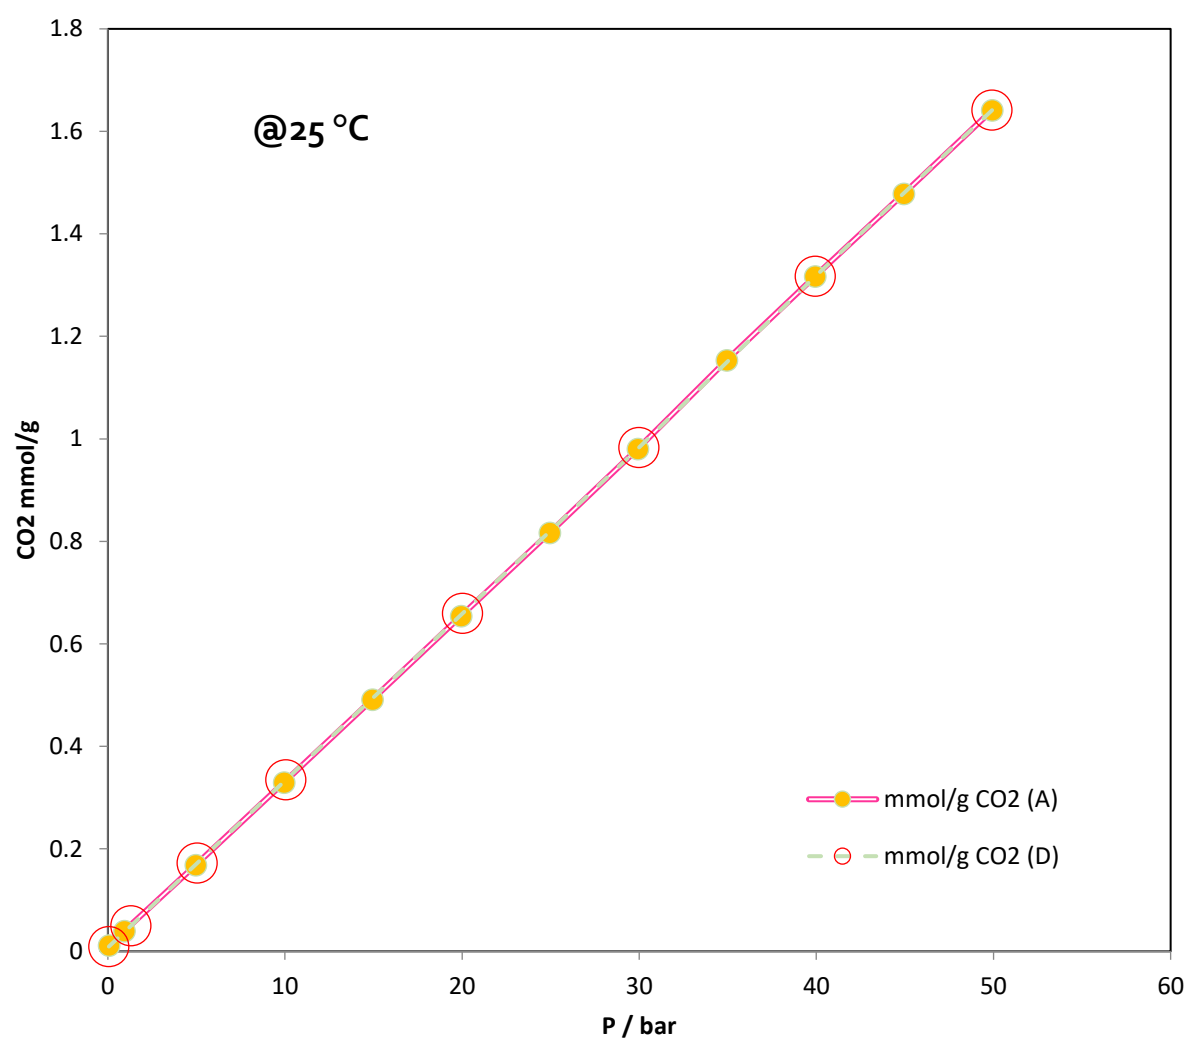

Figure S6. CO<sub>2</sub> absorption-desorption plot at 25 °C for QUF-001.

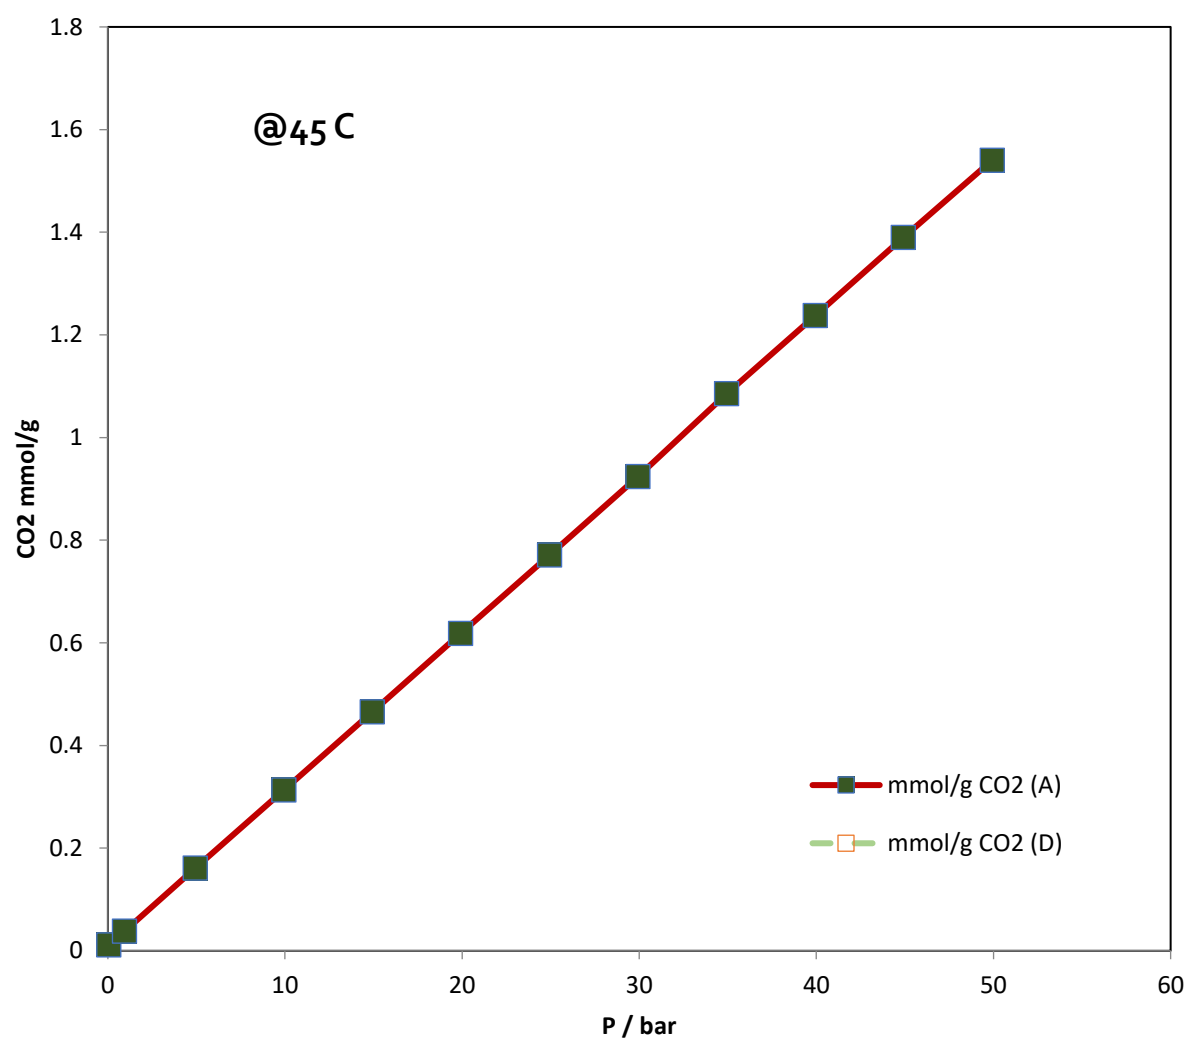

Figure S7. CO<sub>2</sub> absorption-desorption plot at 45 °C for QUF-001.

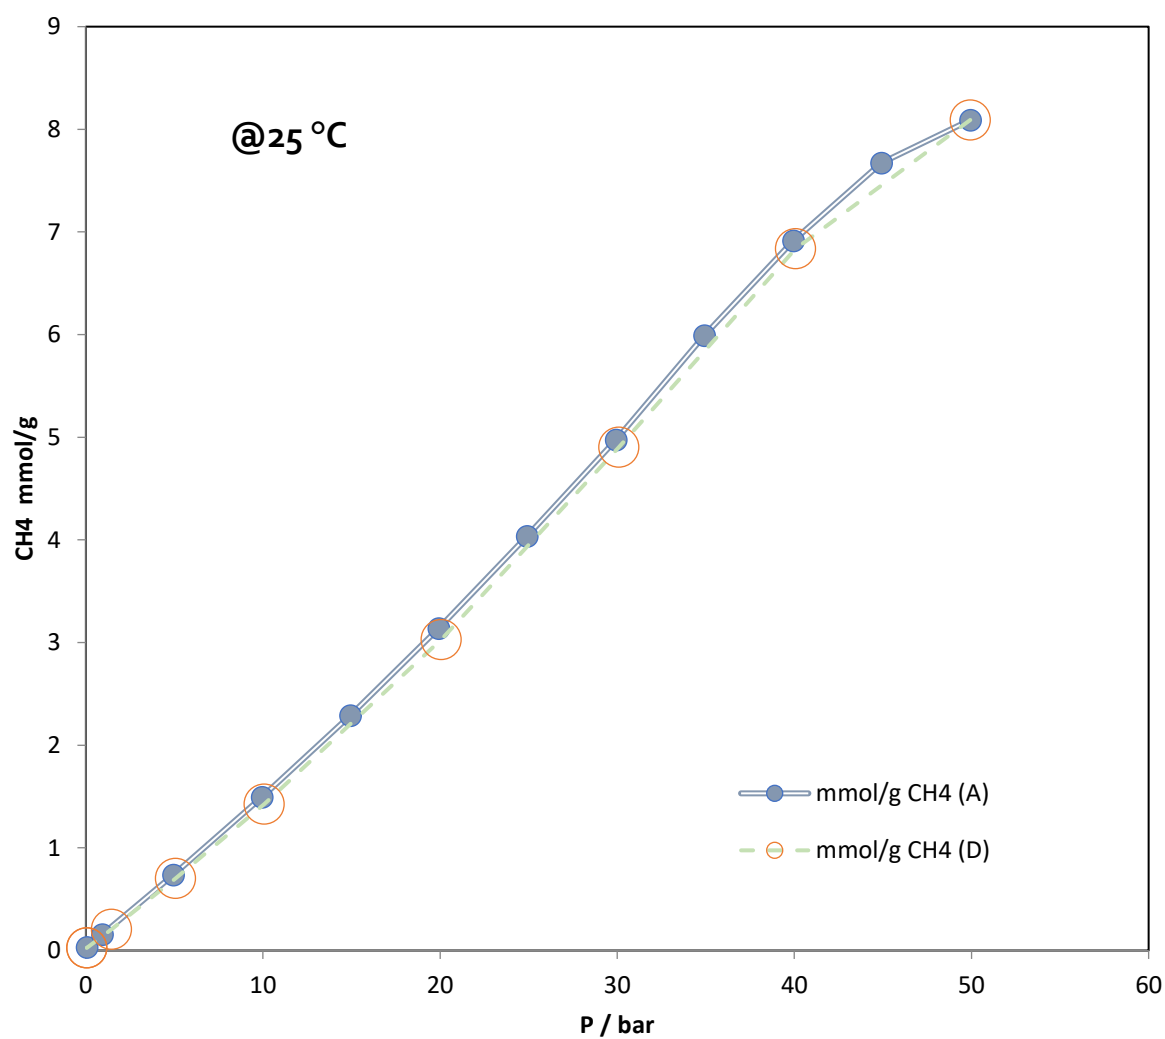

Figure S8. CH<sub>4</sub> absorption-desorption plot at 25 °C for QUF-001.

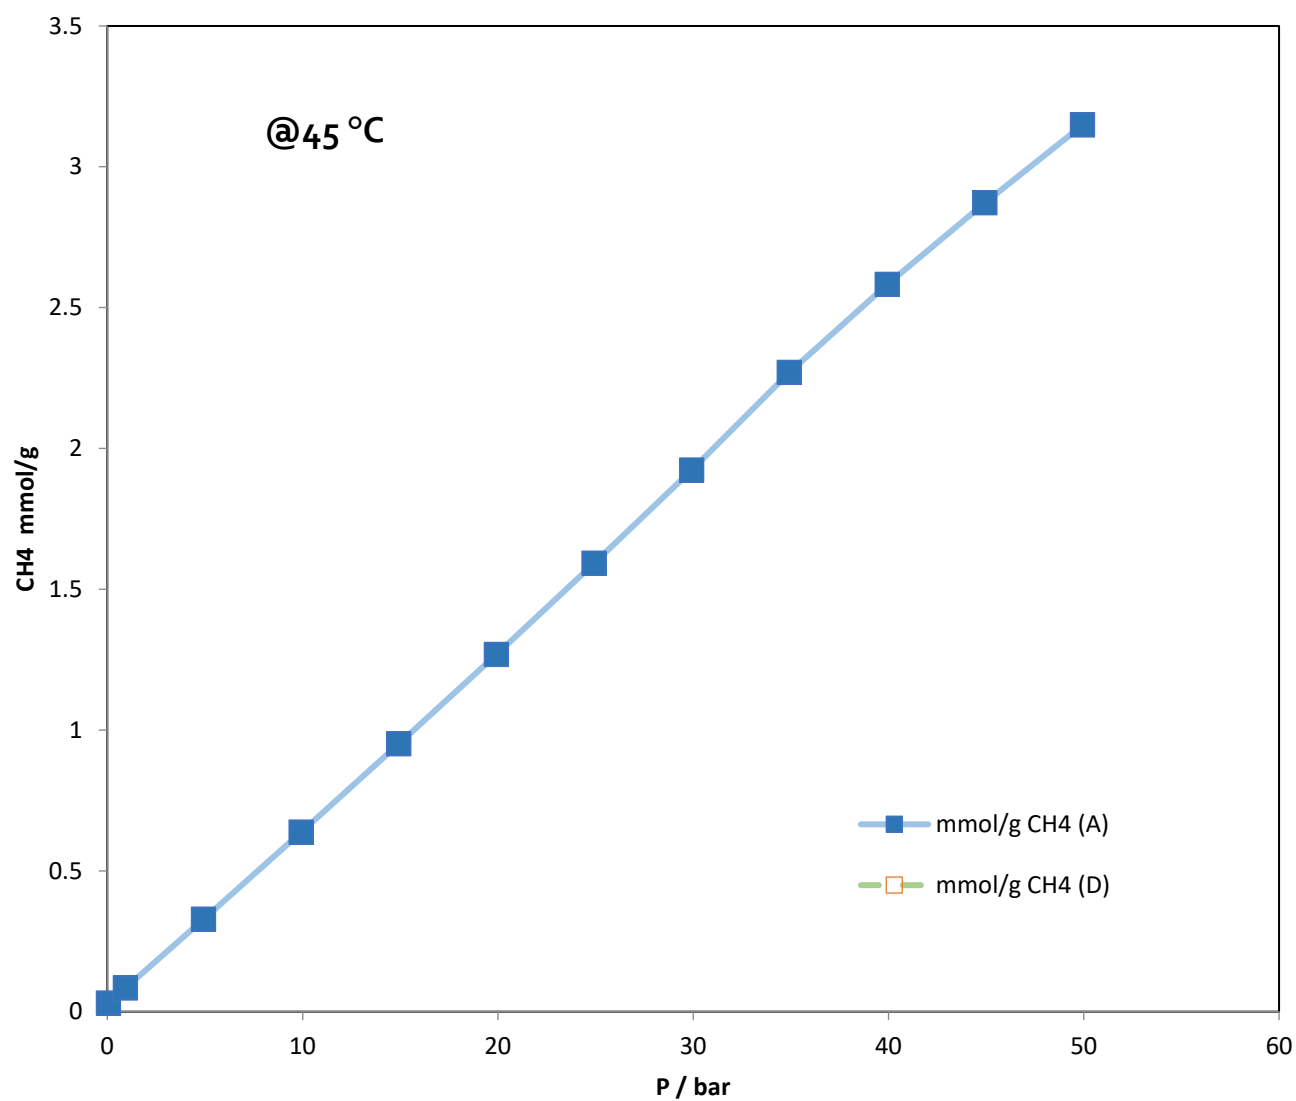

Figure S9. CH<sub>4</sub> absorption-desorption plot at 45 °C for QUF-001.



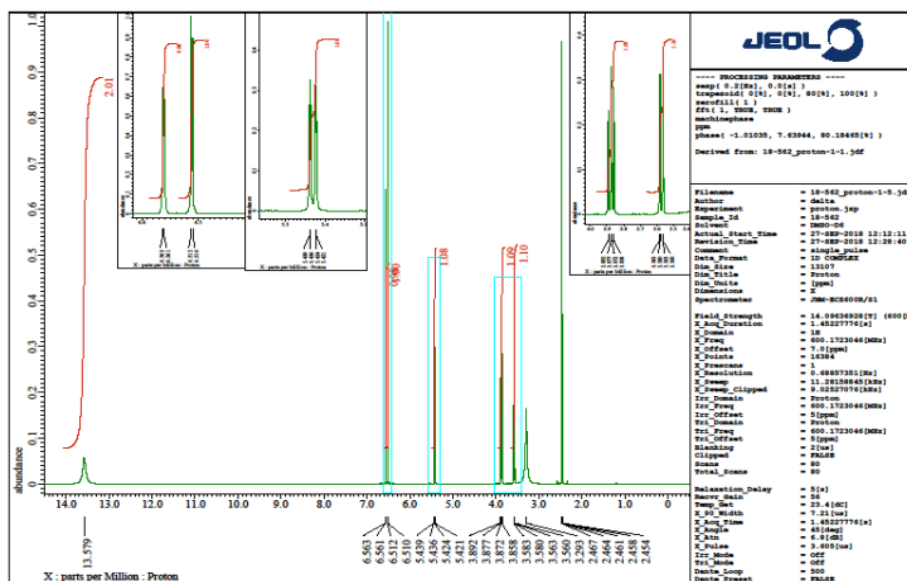Figure S10.  $^1\text{H}$  spectrum of TPDCA.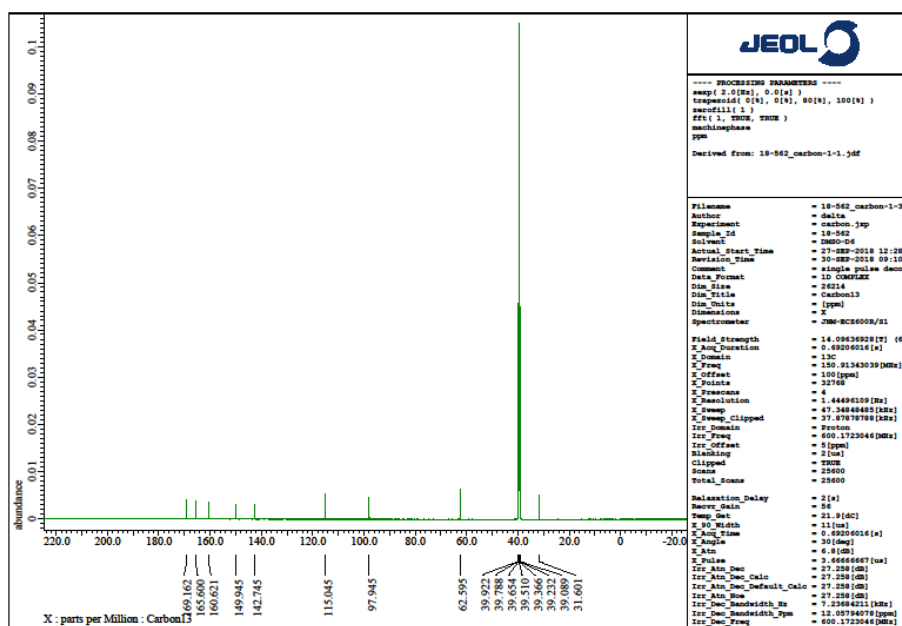Figure S11.  $^{13}\text{C}$  NMR spectra of TPDCA.

Table S1. Structure refinement for QUF-001.

| Data collection                                                            |                               |
|----------------------------------------------------------------------------|-------------------------------|
| Diffractometer                                                             | D8 venture diffractometer     |
| Absorption correction                                                      | Multi-scan SADABS             |
| $T_{\min}, T_{\max}$                                                       | 0.87, 0.89                    |
| No. of measured, independent and observed [ $I > 3\sigma(I)$ ] reflections | 27964, 3269, 1762             |
| $R_{\text{int}}$                                                           | 0.151                         |
| $(\sin \theta/\lambda)_{\text{max}}$ ( $\text{\AA}^{-1}$ )                 | 0.641                         |
| Refinement                                                                 |                               |
| $R[F^2 > 2\sigma(F^2)], wR(F^2), S$                                        | 0.042, 0.106, 1.09            |
| No. of reflections                                                         | 3269                          |
| No. of parameters                                                          | 203                           |
| No. of restraints                                                          | 0                             |
| H-atom treatment                                                           | H-atom parameters constrained |
| $\Delta\rho_{\text{max}}, \Delta\rho_{\text{min}}$ ( $\text{e \AA}^{-3}$ ) | 0.93, −0.62                   |

Table S2. Fractional atomic coordinates and isotropic atomic displacement parameters ( $\text{\AA}^2$ ) for  $\text{C}_{12}\text{H}_{12}\text{N}_2\text{O}_6\text{SZn}\cdot 0.25\text{H}_2\text{O}$ .

| Atom  | Wyck. | Occ. | x           | y           | z           | Ueq ( $\text{\AA}^2$ ) |
|-------|-------|------|-------------|-------------|-------------|------------------------|
| Zn1   | 2i    | 1    | 0.80765(8)  | 0.27583(5)  | 0.32628(5)  | 0.03196(18)            |
| O1    | 2i    | 1    | 0.8870(4)   | 0.4378(3)   | 0.3639(3)   | 0.0460(12)             |
| O2    | 2i    | 1    | 0.5837(5)   | 0.5613(3)   | 0.3135(3)   | 0.0531(13)             |
| O3    | 2i    | 1    | 1.0327(5)   | 0.1350(3)   | 0.3705(3)   | 0.0450(12)             |
| O4    | 2i    | 1    | 0.5524(4)   | 0.2623(2)   | 0.4377(2)   | 0.0349(10)             |
| O5    | 2i    | 1    | 0.6989(4)   | 0.2718(3)   | 0.1718(3)   | 0.0452(12)             |
| O6    | 2i    | 1    | 1.2263(6)   | 0.1535(4)   | 0.2023(4)   | 0.0814(17)             |
| C1    | 2i    | 1    | 0.7515(6)   | 0.5445(4)   | 0.3581(4)   | 0.0353(16)             |
| C2    | 2i    | 1    | 0.8187(6)   | 0.6598(3)   | 0.4173(4)   | 0.0325(15)             |
| C3    | 2i    | 1    | 1.0312(6)   | 0.6848(4)   | 0.3600(4)   | 0.0438(18)             |
| C4    | 2i    | 1    | 0.2894(6)   | 0.1454(4)   | 0.6955(4)   | 0.0311(15)             |
| C5    | 2i    | 1    | 0.4334(6)   | 0.0407(4)   | 0.7300(4)   | 0.0346(15)             |
| C6    | 2i    | 1    | 0.6343(6)   | 0.0087(4)   | 0.6624(4)   | 0.0298(15)             |
| C7    | 2i    | 1    | 1.1959(7)   | 0.1030(4)   | 0.2993(4)   | 0.0364(17)             |
| C8    | 2i    | 1    | 0.6770(6)   | 0.0784(3)   | 0.5624(4)   | 0.0289(14)             |
| C9    | 2i    | 1    | 0.5273(6)   | 0.1887(4)   | 0.5272(4)   | 0.0287(15)             |
| C10   | 2i    | 1    | 0.5185(7)   | 0.3354(4)   | 0.1533(4)   | 0.0464(19)             |
| C11   | 2i    | 1    | 0.5488(11)  | 0.2564(7)   | −0.0437(5)  | 0.113(4)               |
| C12   | 2i    | 1    | 0.2209(8)   | 0.4055(6)   | 0.0408(5)   | 0.078(3)               |
| N1    | 2i    | 1    | 0.3372(5)   | 0.2179(3)   | 0.5976(3)   | 0.0275(12)             |
| N2    | 2i    | 1    | 0.4389(6)   | 0.3377(4)   | 0.0528(4)   | 0.0514(16)             |
| S1    | 2i    | 1    | 0.03459(18) | 0.20847(12) | 0.76504(12) | 0.0503(5)              |
| H1c2  | 2i    | 1    | 0.82808     | 0.63550     | 0.49934     | 0.0390*                |
| H1c3  | 2i    | 1    | 1.12098     | 0.60351     | 0.33159     | 0.0525*                |
| H2c3  | 2i    | 1    | 1.09384     | 0.72913     | 0.41572     | 0.0525*                |
| H1c5  | 2i    | 1    | 0.39947     | −0.01006    | 0.79847     | 0.0415*                |
| H1c8  | 2i    | 1    | 0.81172     | 0.05220     | 0.51485     | 0.0346*                |
| H1c10 | 2i    | 1    | 0.43314     | 0.38606     | 0.21790     | 0.0557*                |
| H1c11 | 2i    | 1    | 0.52964     | 0.30304     | −0.11732    | 0.1361*                |
| H2c11 | 2i    | 1    | 0.69815     | 0.23306     | −0.03382    | 0.1361*                |
| H3c11 | 2i    | 1    | 0.49259     | 0.17845     | −0.04501    | 0.1361*                |
| H1c12 | 2i    | 1    | 0.21526     | 0.44940     | −0.03475    | 0.0941*                |
| H2c12 | 2i    | 1    | 0.13006     | 0.34322     | 0.04553     | 0.0941*                |
| H3c12 | 2i    | 1    | 0.17326     | 0.46861     | 0.10369     | 0.0941*                |

|       |    |      |          |           |            |           |
|-------|----|------|----------|-----------|------------|-----------|
| O7w   | 2i | 0.25 | 0.901(3) | -0.031(3) | 0.0102(18) | 0.147(8)* |
| H1o7w | 2i | 0.25 | 0.80629  | -0.01140  | -0.03374   | 0.1765*   |
| H2o7w | 2i | 0.25 | 0.89117  | -0.08237  | 0.06506    | 0.1765*   |

\*:  $U_{iso}$ .

**Table S3.** Anisotropic displacement parameters ( $\text{\AA}^2$ ) for QUF-001. The anisotropic displacement factor exponent takes the form:  $-2\pi^2[(ha^*)^2U_{11}+...+2hka^*b^*U_{12}]$ .

| Atom | $U_{11}$   | $U_{22}$   | $U_{33}$   | $U_{12}$    | $U_{13}$    | $U_{23}$    |
|------|------------|------------|------------|-------------|-------------|-------------|
| Zn1  | 0.0325(3)  | 0.0242(3)  | 0.0371(3)  | 0.00122(20) | -0.0092(2)  | 0.0019(2)   |
| O1   | 0.0385(17) | 0.0194(15) | 0.078(2)   | 0.0052(13)  | -0.0177(16) | -0.0039(15) |
| O2   | 0.044(2)   | 0.0348(18) | 0.082(3)   | -0.0006(15) | -0.0304(19) | -0.0101(16) |
| O3   | 0.0338(18) | 0.0349(17) | 0.056(2)   | 0.0133(14)  | 0.0001(16)  | 0.0107(15)  |
| O4   | 0.0305(16) | 0.0284(15) | 0.0402(19) | 0.0042(12)  | -0.0022(14) | 0.0088(14)  |
| O5   | 0.0350(18) | 0.054(2)   | 0.044(2)   | 0.0005(15)  | -0.0119(15) | -0.0022(16) |
| O6   | 0.055(2)   | 0.087(3)   | 0.084(3)   | 0.015(2)    | 0.006(2)    | 0.049(2)    |
| C1   | 0.031(2)   | 0.027(2)   | 0.047(3)   | -0.0016(19) | -0.010(2)   | 0.003(2)    |
| C2   | 0.024(2)   | 0.025(2)   | 0.045(3)   | 0.0029(17)  | -0.009(2)   | -0.0006(19) |
| C3   | 0.030(2)   | 0.035(3)   | 0.067(4)   | -0.003(2)   | -0.012(2)   | -0.004(2)   |
| C4   | 0.024(2)   | 0.031(2)   | 0.037(3)   | -0.0040(18) | 0.0001(19)  | -0.003(2)   |
| C5   | 0.034(2)   | 0.028(2)   | 0.038(3)   | -0.0010(19) | -0.004(2)   | 0.0035(19)  |
| C6   | 0.028(2)   | 0.024(2)   | 0.038(3)   | -0.0041(17) | -0.006(2)   | -0.0021(19) |
| C7   | 0.033(3)   | 0.025(2)   | 0.052(3)   | -0.0074(19) | -0.008(2)   | 0.011(2)    |
| C8   | 0.023(2)   | 0.022(2)   | 0.039(3)   | 0.0024(17)  | -0.0035(19) | -0.0065(19) |
| C9   | 0.026(2)   | 0.024(2)   | 0.036(3)   | -0.0033(18) | -0.005(2)   | -0.0044(19) |
| C10  | 0.044(3)   | 0.049(3)   | 0.046(3)   | -0.007(2)   | -0.009(3)   | 0.002(2)    |
| C11  | 0.085(5)   | 0.196(8)   | 0.044(4)   | 0.009(5)    | -0.011(4)   | -0.035(5)   |
| C12  | 0.057(4)   | 0.090(5)   | 0.088(5)   | -0.005(3)   | -0.030(3)   | 0.026(4)    |
| N1   | 0.0252(18) | 0.0197(17) | 0.037(2)   | 0.0002(14)  | -0.0082(16) | -0.0014(15) |
| N2   | 0.049(3)   | 0.066(3)   | 0.040(3)   | -0.008(2)   | -0.019(2)   | 0.012(2)    |
| S1   | 0.0339(7)  | 0.0516(8)  | 0.0580(9)  | 0.0004(6)   | 0.0082(6)   | 0.0039(6)   |
